# Supplementary material for: Nitrogen-doped mesoporous hollow carbon nanoflowers as high performance anode materials of lithium ion batteries
Source: Royal Society of Chemistry journal article supplement (doi:10.1039/c6ra21011b), 2016-01-01
Supplement: c6ra21011b1.pdf [file c6ra21011b1.pdf]

## Supporting Information

### **Nitrogen-doped Mesoporous Hollow Carbon Nanoflowers as High Performance Anode Materials of Lithium Ion Batteries**

Chen Qian<sup>1,3</sup>, Ping Guo<sup>1,3</sup>, Xiue Zhang<sup>2,3</sup>, Rongfang Zhao<sup>2,3</sup>, Qianhui Wu<sup>2,3</sup>, Long Huan<sup>2,3</sup>, Xiao Shen<sup>2,3</sup>, Ming Chen<sup>2,3\*</sup>,

<sup>1</sup>Department of Chemical Engineering, Yangzhou Polytechnic Institute, Yangzhou 225127, P.R. China.

<sup>2</sup> College of Chemistry and Chemical Engineering, Yangzhou University, Yangzhou 225002, P.R. China.

<sup>3</sup> Key Laboratory of Environmental Materials & Environmental Engineering of Jiangsu Province, Yangzhou, Jiangsu, 225002, P. R. China

#### **Synthesis of nitrogen-doped hollow carbon nanorods (N-HCNRs)**

Firstly,  $\beta$ -FeOOH nanorods were prepared according to our previous work.<sup>1</sup> Briefly, the aqueous solution of 1.1250 g  $\text{FeCl}_3 \cdot 6\text{H}_2\text{O}$  and 1.20 g urea dissolved in 20 mL water was heated to 90-95°C to make  $\text{Fe}^{3+}$  hydrolyze for 8h. Then the yellow product was separated from the mother liquor with an ultra-speed centrifuge and rinsed with distilled water repeatedly in order to eliminate the remaining chloride ions on the surfaces, and finally dried in a vacuum oven at temperature of 45°C. Secondly, the  $\beta$ -FeOOH nanorods (0.045 g) was mixed with dopamine (15 mg) in Tris-buffer (50

---

\* Corresponding authors.

*E-mail address:* [chenming@yzu.edu.cn](mailto:chenming@yzu.edu.cn) (M. Chen)

mL, 10 mM; pH 8.5) for 24 h at 50 °C. The resultant product was separated and collected, followed by washing with deionized water and ethanol for 3 times, respectively. Then, the obtained  $\beta$ -FeOOH@PDA composites were dried at 60 °C for 24 h. Thirdly, the  $\beta$ -FeOOH@PDA composites were heated in a quartz tube under Ar atmosphere at 400°C for 2 h with a heating rate of 1 °C min<sup>-1</sup>, which was followed by further treatment at 500°C for 2 h with a heating rate of 5 °C min<sup>-1</sup>. The powder is Fe<sub>3</sub>O<sub>4</sub>@C-N nanorods composites. Lastly, the black product was treated with 2M HCl to remove the Fe<sub>3</sub>O<sub>4</sub> core. The non-magnetic black precipitation was washed with distilled water until the pH was about 7. The final product was dried overnight at 60 °C for 24 h. Nitrogen-doped hollow carbon nanorods (N-HCNRs) were obtained.

#### **Synthesis of hollow carbon nanoflowers (HCNFs)**

The urchin-like  $\alpha$ -FeOOH (0.05 g) was mixed with glucose (0.5 g) in 30 mL deionized water. The mixture was transformed into a Teflon-lined stainless-steel autoclave with 50 mL capacity. Then, the autoclave was placed in an oven and kept at 200°C for 12 h. The resultant product was separated and collected, followed by washing with deionized water and ethanol for 3 times, respectively. Then, the obtained powder was dried at 60 °C overnight. The above intermediate products were heated in a quartz tube under Ar atmosphere at 400°C for 2h with a heating rate of 1°C min<sup>-1</sup>, which was followed by further treatment at 500°C for 2h with a heating rate of 5°C min<sup>-1</sup>. The urchin-like Fe<sub>3</sub>O<sub>4</sub>@C composites were obtained. Finally, the black product was treated with 2M HCl to remove the Fe<sub>3</sub>O<sub>4</sub> core. The non-magnetic black precipitation was washed with distilled water until the pH was about 7. The final product was dried overnight at 60 °C for 24 h. Hollow carbon nanoflowers (HCNFs) were obtained.

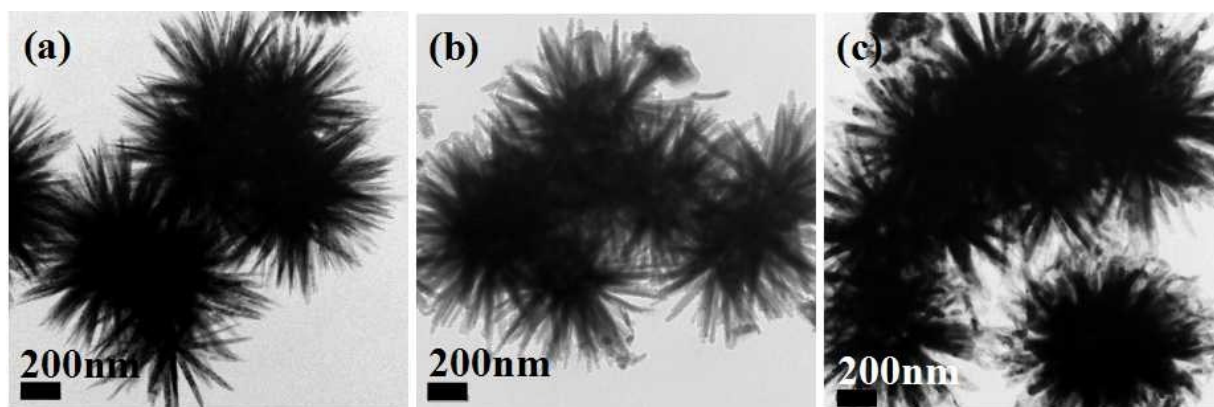

**Fig. S1.** TEM images of (a) urchin-like  $\alpha$ -FeOOH, (b) urchin-like  $\alpha$ -FeOOH@PAD, (c) nitrogen-doped carbon encapsulation urchin-like  $\text{Fe}_3\text{O}_4$ .

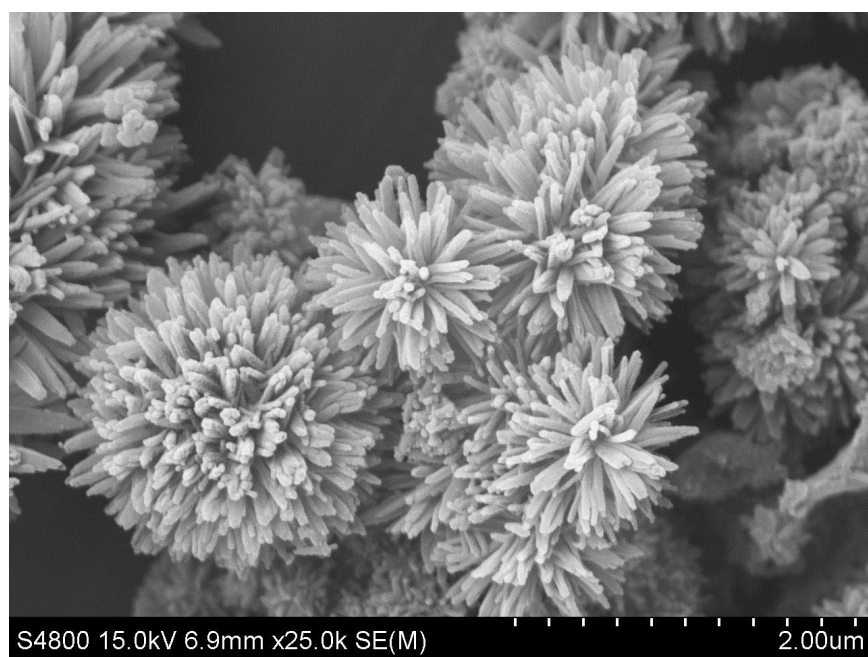

**Fig. S2.** SEM image of nitrogen-doped hollow carbon nanoflowers (N-HCNFs).

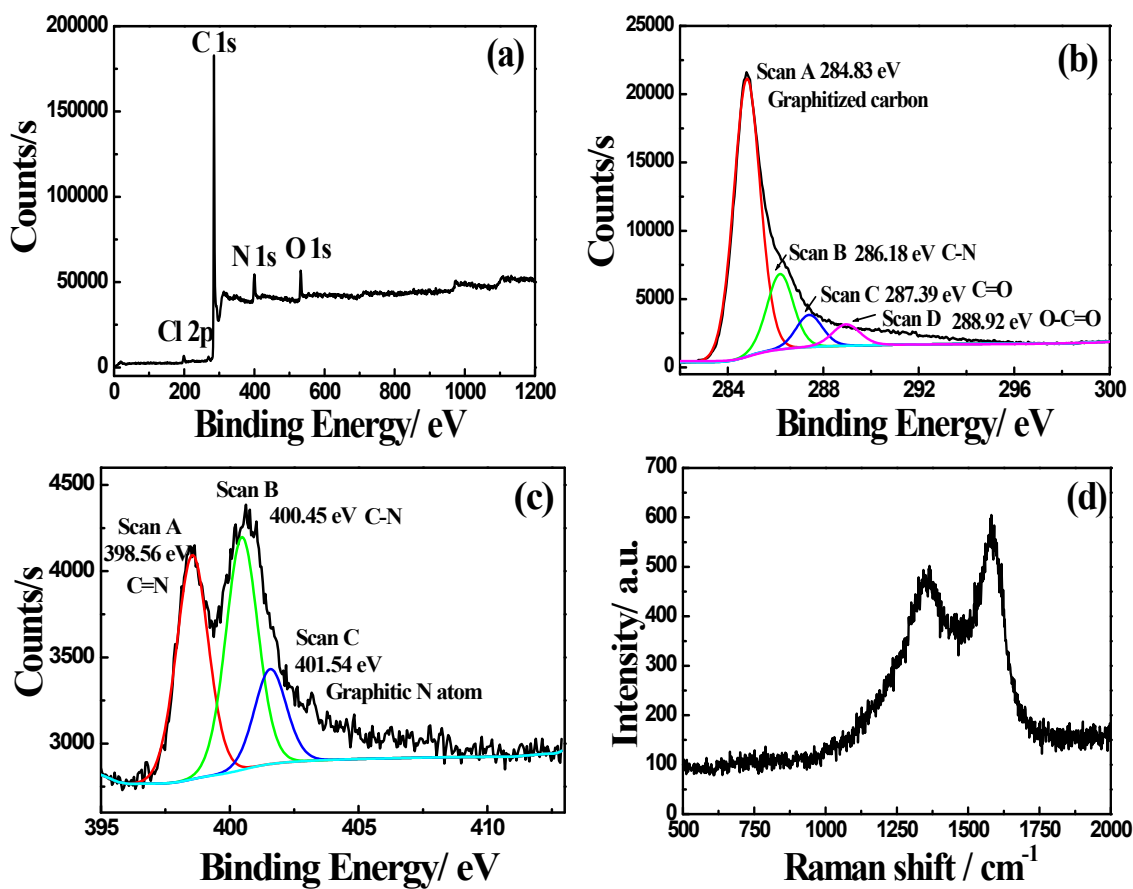

**Fig. S3.** XPS spectra of nitrogen-doped hollow carbon nanorods (N-HCNRs): (a) survey, high-resolution XPS spectra of (b) C 1s, (c) N 1s. (d) Raman spectrum of nitrogen-doped hollow carbon nanorods (N-HCNRs).

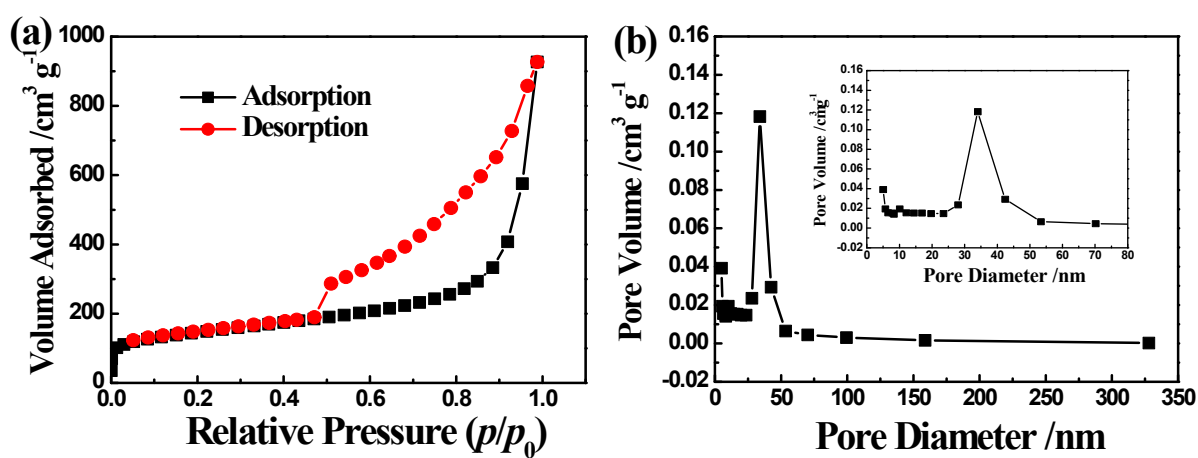

**Fig. S4.** (a) N<sub>2</sub> adsorption–desorption isotherm of nitrogen-doped hollow carbon nanorods (N-HCNRs) and (b) the corresponding pore size distribution.

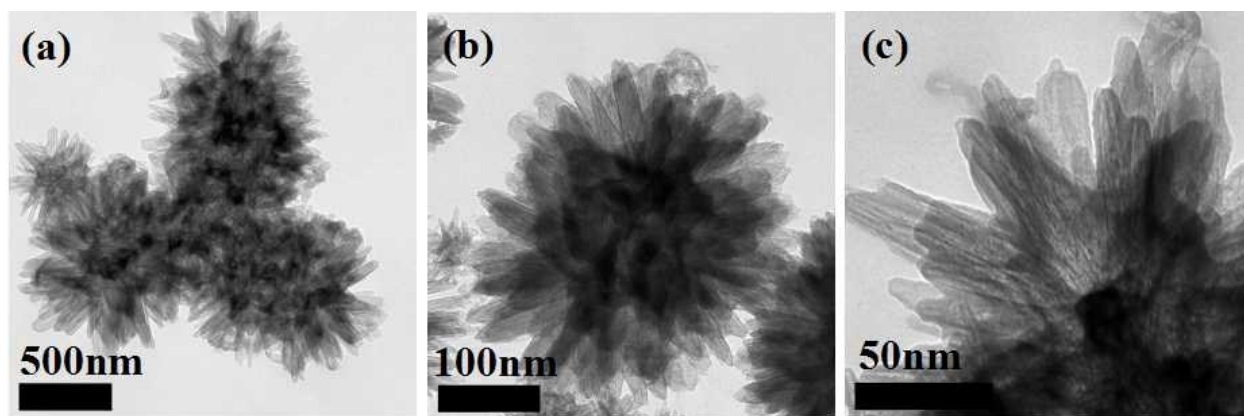

**Fig. S5.** TEM images of hollow carbon nanoflowers (HCNFs) using glucose as carbon source.

**Reference:**

1 M. Chen, J. Jiang, X. Zhou and G. Diao, *J. Nanosci. Nanotechnol.*, 2008, **8**, 3942–3948.
